## Intravenous Intralipid-Induced Blood Pressure Elevation and Endothelial Dysfunction in Obese African-Americans with Type 2 Diabetes

Guillermo E. Umpierrez, Dawn Smiley, Gonzalo Robalino, Limin Peng, Abbas E. Kitabchi, Bobby Khan, Ahn Le, Arshed Quyyumi, Virgil Brown, and Lawrence S. Phillips

Department of Medicine (G.E.U., D.S., G.R., B.K., A.L., A.Q., V.B., L.S.P.) and Rollins School of Public Health (L.P.), Emory University, Atlanta, Georgia 30303; and University of Tennessee Health Science Center (A.E.K.), Memphis, Tennessee 38163

**Objective:** Increased free fatty acids (FFAs) are leading candidates in the pathogenesis of insulin resistance and hypertension in obese subjects. We evaluated the effect of sustained elevations of FFA on blood pressure, endothelial function, insulin secretion, inflammatory markers, and renin-angiotensin system.

**Research Design and Methods:** Twenty-four obese, African-American, normotensive diabetic subjects received a sequential 48-h infusion of Intralipid (20%, 40 ml/h) plus heparin (250 units/h) or normal saline (40 ml/h) plus heparin (250 units/h).

**Results:** Blood pressure was significantly increased within 4 h of lipid infusion and reached a peak increment of 13 mm Hg in systolic and 5 mm Hg in diastolic blood pressure at 24 h ( $P < 0.01$ ). Compared to baseline, lipid infusion reduced flow-mediated dilatation by 11% at 24 h and 18% at 48 h ( $P < 0.001$ ). FFA and triglyceride levels increased from a baseline of  $0.5 \pm 0.2$  mmol/liter and  $135 \pm 76$  mg/dl to  $1.8 \pm 1.0$  mmol/liter and  $376 \pm 314$  mg/dl at 48 h, respectively ( $P < 0.01$ ). C-Reactive protein increased by 35% at 24 h and by 110% at 48 h of lipid infusion. There were no significant changes in plasma renin and aldosterone levels during lipid or saline infusions.

**Conclusion:** Increased FFA levels result in a rapid and sustained elevation in blood pressure, impaired endothelial function, and increased inflammatory markers in obese subjects with type 2 diabetes. The model of FFA-induced hypertension may be useful in examining disease mechanisms associated with the development of hypertension in obese subjects. (*J Clin Endocrinol Metab* 94: 609–614, 2009)

Recent studies suggest that increased free fatty acids (FFAs) (1) are leading candidates in the pathogenesis of insulin resistance, impaired glucose tolerance, and diabetes (2–5). Acute elevations of FFA produce insulin resistance dose-dependently in diabetic and nondiabetic individuals (5, 6). Increased FFA levels have also been associated with the development of hypertension and increased cardiovascular risk (7–9). In healthy volunteers, increases in FFAs with 4-h infusions of lipid emulsion impair endothelium-dependent vasodilatation (10) and increase vascular  $\alpha_1$ -adrenoreceptor-mediated responses (11). At the cellular level, FFAs can reduce nitric oxide bioavailability by inhibiting

nitric oxide synthase activity (12) and stimulate the production of reactive oxygen species (ROS) through activation of reduced nicotinamide adenine dinucleotide phosphate oxidase (13). Oxidative stress is known to alter vasomotor tone and other functions of the endothelium (14), but the mechanisms of FFA-induced hypertension and endothelial dysfunction are not clear.

While studying the effect of high FFA levels on insulin secretion and action (lipotoxicity) in obese African-Americans (15), we observed that the infusion of Intralipid/heparin to increase FFAs approximately 3-fold baseline levels for 48 h resulted in a significant and reproducible rise in systolic and diastolic blood

pressure in obese African-American subjects with type 2 diabetes. In agreement with our observation, Bulow *et al.* (16) reported that raising FFAs in minipigs increased vascular resistance and raised blood pressure by nearly 30 mm Hg. Grekin *et al.* (7) reported that FFA infusion increased arterial pressure by 2–3 mm Hg in Sprague Dawley rats. Similarly, a 4-h infusion of 20% Intralipid at  $0.8 \text{ ml} \cdot \text{m}^{-1} \cdot \text{min}^{-1}$  and heparin (200 U bolus, followed by 1000 U/h) was reported to induce a significant increase in systolic ( $13.5 \pm 2.1 \text{ mm Hg}$ ) and diastolic ( $8.0 \pm 1.5 \text{ mm Hg}$ ) blood pressure in lean, healthy adults (7). We hypothesized that the development of FFA-induced hypertension is associated with acute endothelial dysfunction and inflammatory response and/or activation of the renin-angiotensin system. Accordingly, we performed a systematic evaluation of sustained elevations of FFAs on blood pressure, endothelial function, renin-angiotensin system, insulin secretion, and cardiovascular inflammatory markers in obese subjects with type 2 diabetes.

## Patients and Methods

### Participants

We studied 24 obese, normotensive African-American subjects with type 2 diabetes. Obesity was defined as a body mass index (BMI) of at least  $30 \text{ kg/m}^2$ . All participants had a blood pressure no greater than 130/80 mm Hg and had no prior history of hypertension or receiving antihypertensive drug therapy before the study. Diabetic subjects had a known history of diabetes of 3 yr or less and a hemoglobin A1C below 8%, and were controlled with diet alone or with stable doses of sulfonylureas for the preceding 2 months. Subjects with fasting triglyceride levels above 250 mg/dl or those treated with statins or lipid-lowering therapy were excluded. In addition, subjects with relevant hepatic disease (alanine aminotransferase  $2.5 \times$  > upper limit of normal), serum creatinine at least 1.5 mg/dl for males or at least 1.4 mg/dl for females, pregnancy or breast-feeding status, or with significant medical or mental condition rendering the subject unable to consent were excluded. The institutional review board at Emory University approved the research protocol, and all subjects gave written and signed consent before participation in the study.

### Protocol

Participants were admitted to the General Clinical Research Center at Grady Memorial Hospital, in random order, on two occasions for a 48-h infusion of Intralipid/heparin and saline/heparin. After an overnight fast, an iv catheter was placed in each forearm, one for infusion and one for blood sampling. After two fasting baseline blood samples were drawn, subjects received a 48-h infusion of Intralipid (20%, 40 ml/h) plus heparin (250 U/h) or normal saline (40 ml/h) plus heparin (250 U/h). Blood pressure and heart rate were measured on admission and every 2 h in supine position. Blood samples were drawn on admission for glucose, insulin, C-peptide, FFA, renin, aldosterone, C-reactive protein, and fasting lipoprotein analysis. During the infusion, glucose was measured every 2 h at the bedside and every 6 h for laboratory assays including glucose, insulin, C-peptide, FFA, renin, aldosterone, and C-reactive protein.

The Intralipid 20% long-chain triglyceride emulsion is composed of linoleic acid, 50%; oleic acid, 26%; palmitic acid, 10%; stearic acid, 9%; egg yolk; and phospholipids, 3.5%. During the study period, subjects consumed a 2000 calorie per day diet consisting of 20% of calories derived from protein, 30% from fat, and 50% from carbohydrate. Lipid and saline infusion started around 1200 h. During the first day, patients ate lunch (hour 0) and dinner (hour 6). During the second day of infusion, they ate breakfast (hour 20), lunch (hour 24), and dinner (hour 30).

Thereafter, food and liquids were withheld until the completion of the 48-h infusion.

Endothelial function was measured noninvasively by using ultrasound to evaluate endothelium-dependent flow-mediated vasodilation (17) of the brachial artery. Measurements were performed according to the published guidelines (17) with a high-resolution vascular ultrasound before and after 24 and 48 h of Intralipid and saline infusions. Reactive hyperemia was produced by inflating a pneumatic tourniquet at least 50 mm Hg above systolic blood pressure to occlude arterial flow for 5 min. After cuff deflation, the longitudinal image of the artery was recorded continuously from 30 sec before and 2 min after cuff deflation. A mid-artery pulsed Doppler signal was obtained on immediate cuff release to assess hyperemic flow velocity. The average diameter was determined from at least three different diameter measurements determined along a segment of the vessel. Brachial artery diameter was measured at the same time in the cardiac cycle by use of electrocardiogram gating during image acquisition. The precision of our system is measured to be 0.004 mm.

### Laboratory methods

Plasma glucose was measured using the glucose oxidase method. Triglycerides were measured as esterified glycerol with an enzymatic colorimetric kit (Roche Molecular Biochemicals, Mannheim, Germany). FFA levels were determined by a colorimetric method. Levels of C-reactive protein, insulin, and C-peptide were measured in plasma using a solid phase, two-site sequential chemiluminescent immunometric assay on the DPC Immulite analyzer (Diagnostic Products Corporation, Los Angeles, CA). The coefficient variance of all the assays was less than 5%. The instrument calibrations for the assays were performed as recommended by the manufacturers and were within the specifications.

### Statistical analysis

The primary analysis for this research study targeted changes in blood pressure and endothelial function during 48-h Intralipid plus heparin and normal saline plus heparin infusions. Comparisons between baseline data and values during infusion were carried out using paired *t*-tests. Cross-sectional comparisons between different infusion groups were conducted by two-sample *t*-tests. Repeated measures linear model or repeated measures ANOVA were further used to evaluate differences in outcome changes between saline and lipid infusions, while adjusting for subject's age, BMI, and gender. Statistical significance was defined as a type 1 error of 0.05. All data are expressed as mean  $\pm$  SD.

## Results

### Patient characteristics

Patients were African-Americans (17 males and seven females). Their age (mean  $\pm$  SD) was  $41 \pm 8 \text{ yr}$  (range, 26 to 56 yr) and BMI was  $37 \pm 6 \text{ kg/m}^2$  (range, 31 to  $54 \text{ kg/m}^2$ ), and they had a mean duration of diabetes of  $3.6 \pm 3 \text{ yr}$  (range, 1 to 10 yr). Fourteen patients were treated with diet alone, and 10 patients were treated with low-dose sulfonylureas. The mean hemoglobin A1C was  $6.2 \pm 1\%$ , and the fasting plasma glucose was  $127 \pm 55 \text{ mg/dl}$ . None of the patients had a history of hypertension or of receiving antihypertensive agents.

### Blood pressure changes during Intralipid and saline infusion

The infusion of Intralipid (20% solution at 40 ml/h) and heparin (250 U/h) resulted in a significant and reproducible rise in blood pressure (Fig. 1). The mean systolic and diastolic blood pressure readings before the lipid and saline infusion were  $116 \pm$

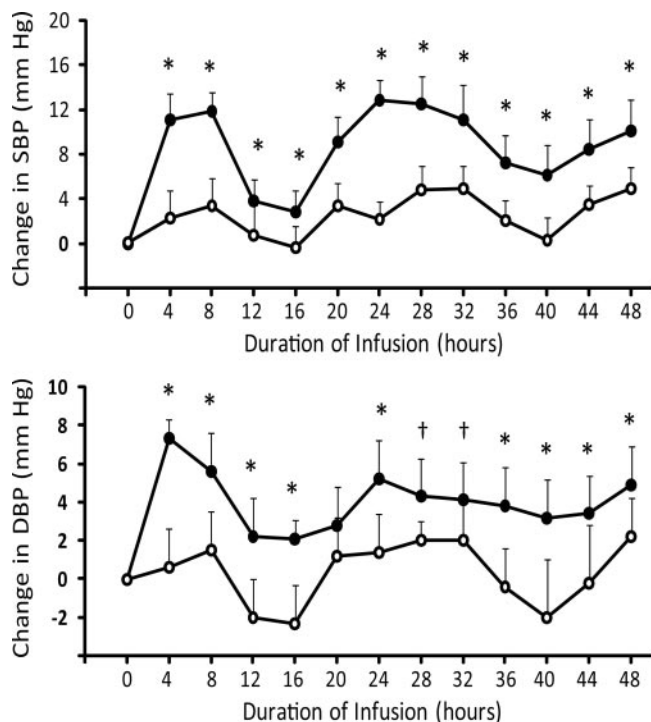

**FIG. 1.** Changes in systolic blood pressure (top) and diastolic blood pressure (bottom) during 48-h Intralipid/heparin (closed circles) and saline/heparin (open circles) infusion in obese subjects with type 2 diabetes. Values are mean  $\pm$  SEM. \*,  $P < 0.01$ . †,  $P < 0.05$ .

15 and  $120 \pm 12$  mm Hg and  $71 \pm 9$  and  $72 \pm 11$  mm Hg, respectively. Intralipid infusion raised systolic and diastolic blood pressure from baseline within 4 h ( $11 \pm 11$  and  $5 \pm 2$  mm Hg), and the blood pressure effects persisted throughout the 48 h of infusion ( $P < 0.01$ ). In contrast, infusion of normal saline at 40 ml/h resulted in no significant blood pressure changes from baseline [ $P =$  not significant (NS)].

During Intralipid infusion, the heart rate increased from a baseline of  $68 \pm 11$  beats/min to  $72 \pm 12$  and  $74 \pm 12$  beats/min at 24 h and 48 h of infusion, respectively ( $P =$  NS). The heart rate was  $67 \pm 11$  beats/min at baseline,  $70 \pm 11$  beats/min at 24 h, and  $66 \pm 11$  beats/min at 48 h of saline infusion ( $P =$  NS).

**Plasma FFAs, triglycerides, renin, aldosterone, and C-reactive protein concentrations**

Changes in plasma FFA, renin, and aldosterone concentrations during the 48-h lipid and saline infusions are shown in Fig. 2. Intralipid infusion resulted in rapid and sustained elevations of FFA levels compared with normal saline. From a fasting FFA of  $0.5 \pm 0.2$  mmol/liter, FFA levels increased to  $1.8 \pm 0.8$  mmol/liter at 24 h ( $P < 0.001$ ) and remained at this level during the 48-h infusion. Compared with baseline levels, saline plus heparin infusion resulted in no significant changes in FFA concentrations. Similarly, triglyceride concentration increased significantly in response to Intralipid infusion compared with saline. Triglyceride levels rose from  $134 \pm 76$  to  $468 \pm 353$  mg/dl at 24 h and  $376 \pm 314$  mg/dl at 48 h of Intralipid infusion ( $P < 0.01$  vs. baseline). Plasma triglyceride concentrations were  $130 \pm 54$  mg/dl at baseline,  $158 \pm 84$  mg/dl at 24 h, and  $147 \pm 47$  mg/dl at 48 h of saline infusion.

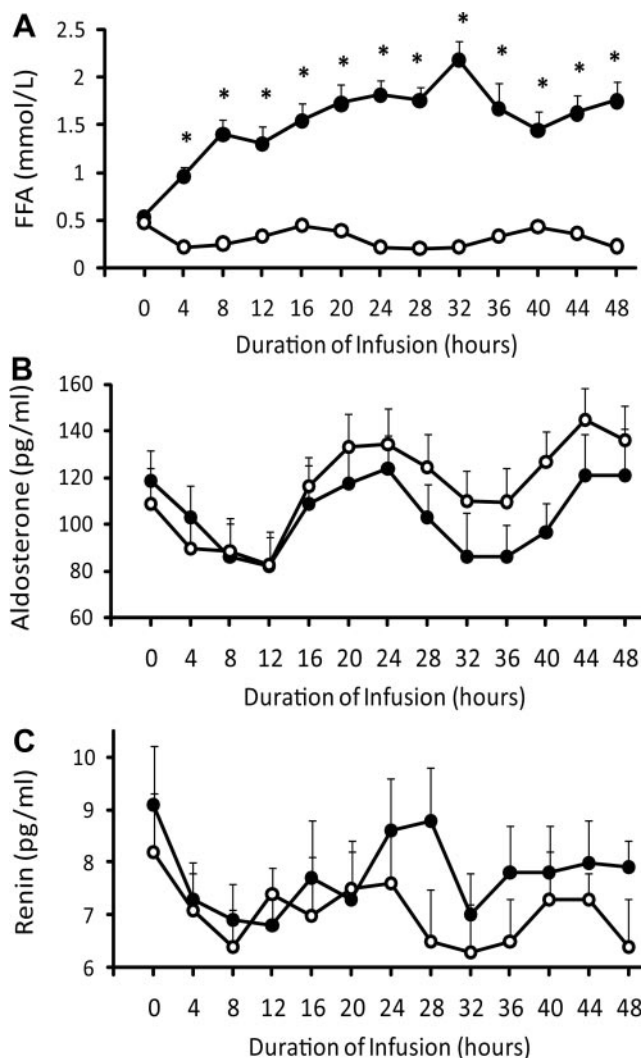

**FIG. 2.** Changes in plasma FFA (A), aldosterone (B), and renin (C) concentration during 48-h Intralipid/heparin and saline/heparin infusion in obese subjects with type 2 diabetes. Values are mean  $\pm$  SEM. \*,  $P < 0.01$ .

Plasma aldosterone and renin concentration were not significantly different between Intralipid and saline infusion ( $P =$  NS). C-Reactive protein concentration increased from a baseline of 1.57 mg/dl to 2.01 mg/dl at 24 h and 2.66 mg/dl at 48 h of lipid infusion, on average 35 and 110% increase, respectively (both  $P < 0.001$ ). C-Reactive protein concentration levels remained unchanged during saline infusion (baseline, 1.65 mg/dl; 24 h, 1.76 mg/dl; and 48 h, 1.63 mg/dl).

**Assessment of endothelial function**

Endothelial function, as measured by percentage change in flow-mediated dilatation (FMD), decreased significantly during Intralipid compared with saline infusion (Fig. 3). Starting at a baseline mean of  $6.4 \pm 4.1$ , FMD decreased to  $5.9 \pm 2.7$  (–11%) at 24 h and to  $5.4 \pm 2.9$  (–18%) at 48 h of Intralipid infusion. During normal saline infusion, the FMD was  $6.4 \pm 2.3$  at baseline,  $6.7 \pm 2.7$  at 24 h (18%), and increased to  $8.2 \pm 2.8$  (42%) at 48 h ( $P = 0.01$  for change pattern with time vs. Intralipid infusion). Of interest, we observed significant gender differences

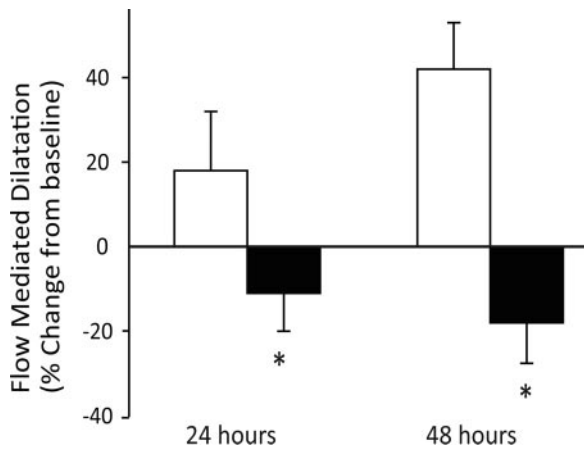

**FIG. 3.** Changes in FMD during 48-h saline/heparin infusion (open bars) and Intralipid/heparin (closed bars) in obese subjects with type 2 diabetes. Values are mean  $\pm$  SEM. \*,  $P < 0.01$ .

in FMD, with more severe impairment in FMD in male patients compared with female subjects ( $P = 0.049$ ).

**Serum glucose and C-peptide concentrations**

Compared with baseline levels, changes in glucose values significantly increased during lipid infusion compared with saline infusion (Fig. 4). Glucose levels rose from  $111 \pm 37$  to  $148 \pm 48$

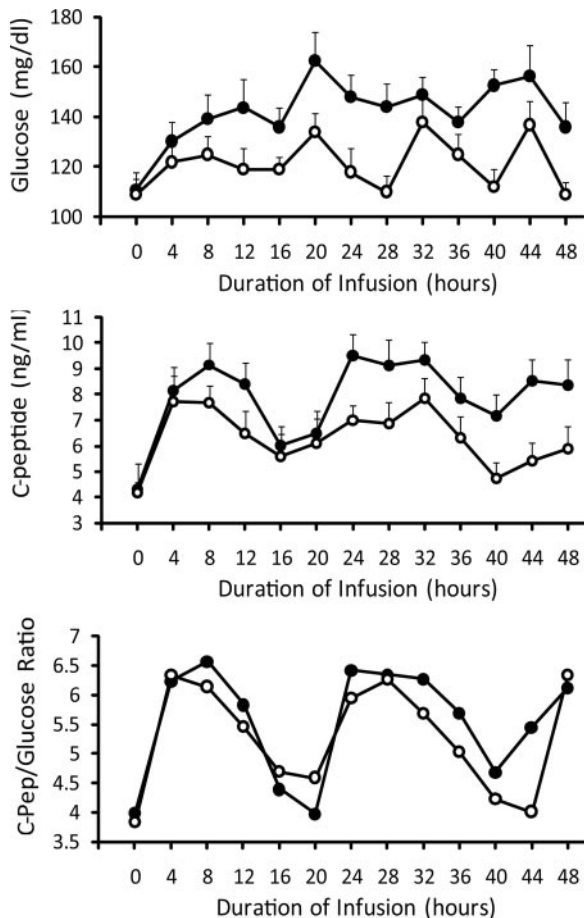

**FIG. 4.** Changes in glucose, C-peptide, and C-peptide/glucose ratio during 48-h Intralipid/heparin and saline/heparin infusion in obese subjects with type 2 diabetes. Values are mean  $\pm$  SEM.

and  $136 \pm 40$  mg/dl after 24 and 48 h of Intralipid infusion ( $P < 0.01$  from baseline). In contrast, during saline infusion, the mean glucose level was  $109 \pm 27$  mg/dl at baseline,  $118 \pm 43$  mg/dl at 24 h, and  $93 \pm 22$  mg/dl after 48 h of saline infusion. C-Peptide levels were similar at baseline between the Intralipid and saline group ( $3.8 \pm 2.3$  vs.  $4.2 \pm 1.6$  ng/ml;  $P = NS$ ). Starting at comparable baseline levels, C-peptide concentration was higher during Intralipid infusion ( $8.3 \pm 4.6$  ng/dl at 24 h, and  $7.9 \pm 4.7$  ng/dl at 48 h; both  $P < 0.001$  vs. baseline) than during saline infusion ( $7.0 \pm 2.6$  ng/dl at 24 h, and  $5.9 \pm 3.8$  ng/dl at 48 h; both  $P < 0.05$  vs. baseline; both  $P = NS$  vs. saline). Insulin release was estimated by the C-peptide glucose ratio [C-peptide (ng/ml)/glucose (mg/dl)  $\times$  100] and by differences in area under the curve during Intralipid and saline infusions. We observed no significant differences in the C-peptide/glucose ratio during the 48-h Intralipid and saline infusions (Fig. 2) or in the area under the curve for insulin ( $P = NS$ ), indicating that increased FFA was not associated with impaired insulin secretion.

**Discussion**

We have shown that FFA increase due to the infusion of Intralipid/heparin for 48 h resulted in a rapid and sustained elevation in blood pressure, increased markers of inflammation, and endothelial dysfunction. Elevated plasma fatty acids have been independently associated with the risk of developing hypertension (7, 8, 18). In the Paris prospective study (18), among the 2968 nonhypertensive and nondiabetic middle-aged Caucasian men, high fasting and 2-h FFA levels were risk factors for hypertension over 3 yr of follow-up after controlling for age, family history of hypertension, alcohol consumption, and BMI. More directly, animal and human studies have shown that short-term Intralipid infusion (2–4 h) increase vascular resistance and raised blood pressure (7, 10, 11, 16). Our study confirms the rapid increase in blood pressure, but in addition, it demonstrates that the elevation of blood pressure is sustained and lasted throughout the 48-h lipid infusion.

Several factors may confound the relationship between FFAs and hypertension in obese subjects. FFA may increase the neurovascular tone by enhancing  $\alpha_1$ -adrenoreceptor sensitivity (11) and by increasing baroreflex sensitivity (19). Increased FFA levels also impair endothelium-dependent vasodilatation (10) and can lead to sympathetic nervous system activation (20, 21). Sympathetic activation can result in vasoconstriction (21), impaired natriuresis (22), enhanced oxidative stress (23), and neural pressor effects (24). Exogenous FFAs also regulate aldosterone secretion (25) and renin-angiotensin system in obese subjects (26). Obesity is strongly related to elevated blood pressure and is associated with higher plasma renin activity (27), tissue-specific angiotensin-converting enzyme (28), and plasma aldosterone (26, 27). In this study, we observed no significant changes in circulating levels of plasma renin and aldosterone during Intralipid and saline infusion, indicating that activation of renin-angiotensin system may not be a primary mechanism for the observed blood pressure changes during lipid infusion.



An acute increase in FFAs causes an inflammatory response, as reflected in an increase in ROS generation by mononuclear cells and an increase of intranuclear nuclear factor- $\kappa$ B binding and nuclear factor- $\kappa$ B expression by mononuclear cells (9, 29). In addition, high FFA levels result in abnormal vascular reactivity because FFAs induce a state of inflammation and reduce nitric oxide release by the endothelium (9, 29). FFAs also reduce vascular prostacyclin secretion as well as rendering it unstable (30). In healthy volunteers, increases in FFAs with 4-h infusions of lipid emulsion impair endothelium-dependent vasodilatation (10). Unsaturated FFAs directly activate both typical and atypical isoforms of protein kinase C, which is involved in regulation of vascular tone and vascular smooth muscle cell growth (26). At the cellular level, FFA can reduce nitric oxide bioavailability by inhibiting nitric oxide synthase activity (12) and stimulating production of ROS through activation of reduced nicotinamide adenine dinucleotide phosphate oxidase (13). ROS are associated with activation of MAPKs, transcription factors, matrix metalloproteinases, increases in IGF-I levels, and endothelial dysfunction (26), and oleic acid induces protein kinase C-dependent production of ROS in vascular smooth muscle cells (31). Our results indicate that high FFA was associated with sustained endothelial dysfunction. FMD decreased by 11% at 24 h and by 18% at 48 h of Intralipid infusion.

Clinical and experimental data indicate that changes in lipid metabolism may contribute to the development of type 2 diabetes. Acute elevations of FFA produce insulin resistance dose-dependently in diabetic and nondiabetic individuals (5, 6, 32). In addition to inhibiting insulin action, recent evidence indicates that FFAs also have an important role in the regulation of pancreatic  $\beta$ -cell function (33, 34). The acute or short-term stimulatory effect of FFAs on glucose-stimulated insulin secretion has been well described both *in vitro* and *in vivo* (35). Recent studies, however, have shown that prolonged (48 h) exposure of rat (36) and human islets (37) to fatty acids decreases glucose-stimulated insulin secretion. Mason *et al.* (33) showed in the rat model that a prolonged *in vitro* elevation of FFAs with an iv infusion of heparin/Intralipid decreases insulin secretion in response to hyperglycemic stimulus. The effect of prolonged elevation of FFAs on insulin secretion in humans remains controversial. Several investigators have reported that 24- to 48-h elevation of FFAs either increased (6) or decreased insulin secretion (38, 39). In our study, increased FFA levels by Intralipid infusion caused a significant increase in plasma glucose concentration without a significant rise in C-peptide levels compared with saline infusion. Although the increased blood glucose levels can be the result of FFA-induced insulin resistance, the C-peptide response during lipid infusion (Fig. 4) suggests that the amount of insulin secreted was inadequate to maintain normal glucose homeostasis. In agreement with these results, Kashyap *et al.* (39) recently reported that a 4-d lipid infusion impairs insulin secretion but does not worsen insulin resistance in already insulin-resistant subjects.

We acknowledge the following limitations in this study. Intralipid emulsion is a soybean oil-based lipid emulsion rich in  $\omega$ -6 polyunsaturated fatty acids (40) that is different from African-

American dietary intake. Due to its high content of linoleic acid, soybean-based lipid emulsions might promote the generation of arachidonic acid-derived eicosanoids and exaggerate the inflammatory response (40). In addition, the high levels of polyunsaturated fatty acids have been shown to impair endothelial function and nitric oxide production (40). It should be noted that we infused Intralipid 20% at 40 ml/h, which resulted in supraphysiological FFA levels. It is not known whether more physiological FFA levels may also increase blood pressure and cause endothelial dysfunction, and/or whether comparable increases in FFAs by repeated oral fat load result in similar blood pressure and vascular effects as iv lipid infusion. In this study, we only included obese African-Americans with type 2 diabetes, so the effect of FFAs in lean, nondiabetic subjects from different ethnic populations needs to be determined in future studies. Finally, in this study we assessed vascular reactivity by changes in FMD during reactive hyperemia. The technique provokes the release of nitric oxide, resulting in vasodilation that can be quantitated as an index of vasomotor function. The noninvasive nature of the technique allows repeated measurements over time to study the effectiveness of various interventions that may affect vascular health. However, despite its widespread use, there are technical and interpretive limitations of this technique. Recently, assessment of forearm blood flow during intraarterial infusion of acetylcholine or nitroprusside has been shown to represent a more accurate and a more reproducible assessment of endothelium-dependent and endothelium-independent dilation.

In summary, our studies indicate that sustained elevation in FFAs by Intralipid infusion is associated with a rapid and sustained increase in blood pressure, increased levels of inflammatory markers, and endothelial dysfunction. Our model should be useful to examine disease mechanisms and test new therapeutic interventions to correct the different disorders associated with hypertension and insulin resistance.

## Acknowledgments

We appreciate the support of the nursing and technical staff of the Grady Memorial Hospital General Clinical Research Center.

Address all correspondence and requests for reprints to: Guillermo Umpierrez, M.D., Professor of Medicine, Associate Director, General Clinical Research Center, Emory University School of Medicine, 49 Jesse Hill Jr. Drive, Atlanta, Georgia 30303. E-mail: geumpie@emory.edu.

This study was supported by research grants from the American Diabetes Association (7-03-CR-35), the American Heart Association (0555306B), and the National Institutes of Health (R03 DK073190-01 and MO1-RR00039), and by an unrestricted research grant from GlaxoSmithKline.

Disclosure Statement: G.E.U. has received research support from the American Diabetes Association, American Heart Association, National Institutes of Health, GlaxoSmithKline, and Takeda Pharmaceuticals. G.E.U. has received honoraria and lecture fees from Takeda as a member of the speaker's bureau. D.S. has received research grant support from Takeda. G.R., L.P., A.E.K., B.K., A.L., A.Q., V.B., and L.S.P. have nothing to declare as it relates to this manuscript.

## References

- Lu G, Meier KE, Jaffa AA, Rosenzweig SA, Egan BM 1998 Oleic acid and angiotensin II induce a synergistic mitogenic response in vascular smooth muscle cells. *Hypertension* 31:978–985
- Kahn BB, Flier JS 2000 Obesity and insulin resistance. *J Clin Invest* 106:473–481
- Boden G, Jadali F, White J, Liang Y, Mozzoli M, Chen X, Coleman E, Smith C 1991 Effects of fat on insulin-stimulated carbohydrate metabolism in normal men. *J Clin Invest* 88:960–966
- Matthaei S, Stumvoll M, Kellerer M, Haring HU 2000 Pathophysiology and pharmacological treatment of insulin resistance. *Endocr Rev* 21:585–618
- Roden M, Price TB, Perseghin G, Petersen KF, Rothman DL, Cline GW, Shulman GI 1996 Mechanism of free fatty acid-induced insulin resistance in humans. *J Clin Invest* 97:2859–2865
- Boden G, Chen X, Rosner J, Barton M 1995 Effects of a 48-h fat infusion on insulin secretion and glucose utilization. *Diabetes* 44:1239–1242
- Grekin RJ, Dumont CJ, Vollmer AP, Watts SW, Webb RC 1997 Mechanisms in the pressor effects of hepatic portal venous fatty acid infusion. *Am J Physiol* 273:R324–R330
- Egan BM, Hennes MM, Stepniakowski KT, O'Shaughnessy IM, Kissebah AH, Goodfriend TL 1996 Obesity hypertension is related more to insulin's fatty acid than glucose action. *Hypertension* 27:723–728
- Dandona P, Chaudhuri A, Aljada A 2004 Endothelial dysfunction and hypertension in diabetes mellitus. *Med Clin North Am* 88:911–931, x–xi
- Steinberg HO, Tarshoby M, Monestel R, Hook G, Cronin J, Johnson A, Bayazeed B, Baron AD 1997 Elevated circulating free fatty acid levels impair endothelium-dependent vasodilation. *J Clin Invest* 100:1230–1239
- Stojiljkovic MP, Zhang D, Lopes HF, Lee CG, Goodfriend TL, Egan BM 2001 Hemodynamic effects of lipids in humans. *Am J Physiol Regul Integr Comp Physiol* 280:R1674–R1679
- Davda RK, Stepniakowski KT, Lu G, Ullian ME, Goodfriend TL, Egan BM 1995 Oleic acid inhibits endothelial nitric oxide synthase by a protein kinase C-independent mechanism. *Hypertension* 26:764–770
- Inoguchi T, Li P, Umeda F, Yu HY, Kakimoto M, Imamura M, Aoki T, Etoh T, Hashimoto T, Naruse M, Sano H, Utsumi H, Nawata H 2000 High glucose level and free fatty acid stimulate reactive oxygen species production through protein kinase C-dependent activation of NAD(P)H oxidase in cultured vascular cells. *Diabetes* 49:1939–1945
- Cai H, Harrison DG 2000 Endothelial dysfunction in cardiovascular diseases: the role of oxidant stress. *Circ Res* 87:840–844
- Umpierrez GE, Smiley D, Gosmanov A, Thomason D 2007 Ketosis-prone type 2 diabetes: effect of hyperglycemia on  $\beta$ -cell function and skeletal muscle insulin signaling. *Endocr Pract* 13:283–290
- Bulow J, Madsen J, Hojgaard L 1990 Reversibility of the effects on local circulation of high lipid concentrations in blood. *Scand J Clin Lab Invest* 50:291–296
- Corretti MC, Anderson TJ, Benjamin EJ, Celermajer D, Charbonneau F, Creager MA, Deanfield J, Drexler H, Gerhard-Herman M, Herrington D, Vallance P, Vita J, Vogel R 2002 Guidelines for the ultrasound assessment of endothelial-dependent flow-mediated vasodilation of the brachial artery: a report of the International Brachial Artery Reactivity Task Force. *J Am Coll Cardiol* 39:257–265
- Fagot-Campagna A, Balkau B, Simon D, Warnet JM, Claude JR, Ducimetiere P, Eschwege E 1998 High free fatty acid concentration: an independent risk factor for hypertension in the Paris Prospective Study. *Int J Epidemiol* 27:808–813
- Gadegbeku CA, Dhandayuthapani A, Sadler ZE, Egan BM 2002 Raising lipids acutely reduces baroreflex sensitivity. *Am J Hypertens* 15:479–485
- Paolisso G, Manzella D, Rizzo MR, Ragno E, Barbieri M, Varricchio G, Varricchio M 2000 Elevated plasma fatty acid concentrations stimulate the cardiac autonomic nervous system in healthy subjects. *Am J Clin Nutr* 72:723–730
- Esler M 2000 The sympathetic system in essential hypertension. *Rev Port Cardiol* 19(Suppl 2):II9–II14
- Coatmellec-Tagliani G, Ribiere C 2003 Factors that influence the risk of hypertension in obese individuals. *Curr Opin Nephrol Hypertens* 12:305–308
- Manzella D, Grella R, Marfella R, Giugliano D, Paolisso G 2002 Elevated post-prandial free fatty acids are associated with cardiac sympathetic overactivity in type II diabetic patients. *Diabetologia* 45:1737–1738
- Rowe JW, Young JB, Minaker KL, Stevens AL, Pallotta J, Landsberg L 1981 Effect of insulin and glucose infusions on sympathetic nervous system activity in normal man. *Diabetes* 30:219–225
- Goodfriend TL, Ball DL, Elliott ME, Morrison AR, Evenson MA 1991 Fatty acids are potential endogenous regulators of aldosterone secretion. *Endocrinology* 128:2511–2519
- Egan BM, Greene EL, Goodfriend TL 2001 Insulin resistance and cardiovascular disease. *Am J Hypertens* 14:116S–125S
- Tuck ML, Sowers J, Dornfeld L, Klezlik G, Maxwell M 1981 The effect of weight reduction on blood pressure, plasma renin activity, and plasma aldosterone levels in obese patients. *N Engl J Med* 304:930–933
- Barton M, Carmona R, Morawietz H, d'Uscio LV, Goettsch W, Hillen H, Haudenschild CC, Krieger JE, Munter K, Lattmann T, Luscher TF, Shaw S 2000 Obesity is associated with tissue-specific activation of renal angiotensin-converting enzyme in vivo: evidence for a regulatory role of endothelin. *Hypertension* 35:329–336
- Tripathy D, Mohanty P, Dhindsa S, Syed T, Ghanim H, Aljada A, Dandona P 2003 Elevation of free fatty acids induces inflammation and impairs vascular reactivity in healthy subjects. *Diabetes* 52:2882–2887
- Mikhailidis DP, Mikhailidis AM, Barradas MA, Dandona P 1983 Effect of nonesterified fatty acids on the stability of prostacyclin activity. *Metabolism* 32:717–721
- Lu G, Greene EL, Nagai T, Egan BM 1998 Reactive oxygen species are critical in the oleic acid-mediated mitogenic signaling pathway in vascular smooth muscle cells. *Hypertension* 32:1003–1010
- Boden G, Lebed B, Schatz M, Homko C, Lemieux S 2001 Effects of acute changes of plasma free fatty acids on intramyocellular fat content and insulin resistance in healthy subjects. *Diabetes* 50:1612–1617
- Mason TM, Goh T, Tchpashvili V, Sandhu H, Gupta N, Lewis GF, Giacca A 1999 Prolonged elevation of plasma free fatty acids desensitizes the insulin secretory response to glucose in vivo in rats. *Diabetes* 48:524–530
- Unger RH, Zhou YT 2001 Lipotoxicity of  $\beta$ -cells in obesity and in other causes of fatty acid spillover. *Diabetes* 50(Suppl 1):S118–S121
- Dobbins RL, Chester MW, Daniels MB, McGarry JD, Stein DT 1998 Circulating fatty acids are essential for efficient glucose-stimulated insulin secretion after prolonged fasting in humans. *Diabetes* 47:1613–1618
- Sako Y, Grill VE 1990 A 48-hour lipid infusion in the rat time-dependently inhibits glucose-induced insulin secretion and B cell oxidation through a process likely coupled to fatty acid oxidation. *Endocrinology* 127:1580–1589
- Zhou YP, Grill V 1995 Long term exposure to fatty acids and ketones inhibits B-cell functions in human pancreatic islets of Langerhans. *J Clin Endocrinol Metab* 80:1584–1590
- Carpentier A, Mittelman SD, Bergman RN, Giacca A, Lewis GF 2000 Prolonged elevation of plasma free fatty acids impairs pancreatic  $\beta$ -cell function in obese nondiabetic humans but not in individuals with type 2 diabetes. *Diabetes* 49:399–408
- Kashyap S, Belfort R, Gastaldelli A, Pratipanawatr T, Berria R, Pratipanawatr W, Bajaj M, Mandarino L, DeFronzo R, Cusi K 2003 A sustained increase in plasma free fatty acids impairs insulin secretion in nondiabetic subjects genetically predisposed to develop type 2 diabetes. *Diabetes* 52:2461–2474
- Waitzberg DL, Torrinhas RS, Jacintho TM 2006 New parenteral lipid emulsions for clinical use. *JPEN J Parenter Enteral Nutr* 30:351–367
